# Supplementary material for: Prevalence, risk factors and treatment outcomes of isoniazid resistant TB in Bulawayo city, Zimbabwe: A cohort study
Source: PubMed Central journal article supplement (PMC8655986; doi:10.3855/jidc.12319), 2020-08-31
Supplement: NIHMS1760335-supplement-1.pdf [file NIHMS1760335-supplement-1.pdf]

**Annex – Supplementary Items****Supplementary Table 1.** Comparison of demographic and clinical characteristics with and without receipt sample at the NTBRL for CDST among bacteriologically-confirmed TB patients in Bulawayo City, Zimbabwe (March 2017-December 2018).

| Variable                                       | Receipt of sample at NTBRL, n (%) |              | P-value           |
|------------------------------------------------|-----------------------------------|--------------|-------------------|
|                                                | No                                | Yes          |                   |
| Total                                          | 548 (100)                         | 1609 (100)   |                   |
| <b>Gender</b>                                  |                                   |              |                   |
| Male                                           | 332 (60.6)                        | 982 (60.9)   | 0.89              |
| Female                                         | 216 (39.4)                        | 630 (39.1)   |                   |
| <b>Age category (in years):</b>                |                                   |              |                   |
| < 15                                           | 9 (1.6)                           | 36 (2.2)     | 0.532             |
| 15-24                                          | 65 (11.9)                         | 202 (12.5)   |                   |
| 25-34                                          | 172 (31.4)                        | 437 (27.1)   |                   |
| 35-44                                          | 150 (27.4)                        | 453 (28.1)   |                   |
| 45-54                                          | 75 (13.7)                         | 229 (14.2)   |                   |
| 55+                                            | 50 (9.1)                          | 178 (11.0)   |                   |
| Not recorded                                   | 27 (4.9)                          | 77 (4.8)     |                   |
| <b>Type of TB patient:</b>                     |                                   |              |                   |
| New                                            | 526 (96.0)                        | 1505 (93.4)  | 0.067             |
| Retreatment                                    | 13 (2.4)                          | 54 (3.4)     |                   |
| Not recorded                                   | 9 (1.6)                           | 53 (3.3)     |                   |
| <b>Site of TB</b>                              |                                   |              |                   |
| Pulmonary TB                                   | 523 (95.4)                        | 1494 (92.7)  | <b>0.013</b>      |
| Extra-pulmonary TB                             | 4 (< 1)                           | 5 (< 1)      |                   |
| Not recorded                                   | 21 (3.8)                          | 113 (7.0)    |                   |
| <b>Genotypic rifampicin resistance pattern</b> |                                   |              |                   |
| Rif -ve                                        | 512 (93.4)                        | 1,486 (92.2) | 0.170             |
| Rif +ve                                        | 32 (5.8)                          | 121 (7.5)    |                   |
| Rif Indeterminate                              | 4 (< 1)                           | 5 (< 1)      |                   |
| <b>HIV and ART status</b>                      |                                   |              |                   |
| HIV-ve                                         | 108 (19.7)                        | 262 (16.3)   | <b>&lt; 0.001</b> |
| HIV +ve, on ART                                | 215 (39.2)                        | 526 (32.6)   |                   |
| HIV +ve, ART status unknown                    | 57 (10.4)                         | 178 (11.0)   |                   |
| HIV status unknown                             | 168 (30.7)                        | 646 (40.1)   |                   |

TB = Tuberculosis; NTBRL = National Tuberculosis Reference Laboratory; CDST = Culture and Drug Susceptibility Test; Rif +ve = Rifampicin resistance detected, Rif -ve = Rifampicin sensitive; HIV = Human immunodeficiency virus; ART = Antiretroviral therapy.

**Supplementary Table 2.** Comparison of demographic and clinical characteristics with and without culture growth on CDST among bacteriologically-confirmed TB patients in Bulawayo City, Zimbabwe (March 2017-December 2018).

| Variable                        | N     | Culture growth, n (%) |            | P-value           |
|---------------------------------|-------|-----------------------|------------|-------------------|
|                                 |       | No                    | Yes        |                   |
| Total                           | 1,612 | 869 (100)             | 743 (100)  |                   |
| <b>Gender</b>                   |       |                       |            |                   |
| Male                            | 982   | 493 (56.7)            | 489 (65.8) | <b>&lt; 0.001</b> |
| Female                          | 630   | 376 (43.3)            | 254 (34.2) |                   |
| <b>Age category (in years):</b> |       |                       |            |                   |
| < 15                            | 36    | 23 (2.7)              | 13 (1.75)  | <b>0.005</b>      |
| 15-24                           | 202   | 87 (10.0)             | 115 (15.5) |                   |
| 25-34                           | 437   | 231 (26.6)            | 206 (27.7) |                   |
| 35-44                           | 453   | 245 (28.2)            | 208 (28.0) |                   |
| 45-54                           | 229   | 125 (14.4)            | 104 (14.0) |                   |
| 55+                             | 178   | 107 (12.3)            | 71 (9.6)   |                   |
| Not recorded                    | 77    | 51 (5.9)              | 26 (3.5)   |                   |
| <b>Type of TB patient:</b>      |       |                       |            |                   |
| New                             | 1,505 | 805 (92.6)            | 700 (94.2) | <b>&lt; 0.001</b> |
| Retreatment                     | 54    | 16 (1.8)              | 38 (5.1)   |                   |
| Not recorded                    | 53    | 48 (5.5)              | 5 (< 1)    |                   |
| <b>Site of TB</b>               |       |                       |            |                   |
| Pulmonary TB                    | 1,494 | 769 (88.5)            | 725 (97.6) | <b>&lt; 0.001</b> |
| Extra-pulmonary TB              | 5     | 3 (< 1)               | 2 (< 1)    |                   |
| Not recorded                    | 113   | 97 (11.2)             | 16 (2.2)   |                   |
| <b>HIV and ART status</b>       |       |                       |            |                   |
| HIV-ve                          | 262   | 84 (9.7)              | 178 (24.0) | <b>&lt; 0.001</b> |
| HIV +ve, on ART                 | 526   | 219 (25.2)            | 307 (41.3) |                   |
| HIV +ve, ART status unknown     | 178   | 92 (10.6)             | 86 (11.6)  |                   |
| HIV status unknown              | 646   | 474 (54.6)            | 172 (23.2) |                   |

TB = Tuberculosis; CDST = Culture and Drug Susceptibility Test; Rif +ve = Rifampicin resistance detected, Rif -ve = Rifampicin sensitive; HIV- Human immunodeficiency virus; ART- Antiretroviral therapy.
